# Supplementary material for: Babesia divergens egress from host cells is orchestrated by essential and druggable kinases and proteases
Source: Research Square preprint supplement (doi:10.21203/rs.3.rs-2553721/v1), 2023-02-28
Supplement: Supplementary file 1 [file 4ce9987a481e7e30062fe39c.docx]

| Primer name | Primer sequence (5’-3’) | Primer function |
| --- | --- | --- |
| BE-8 | ATGACTCGAGGCTAGCGTTTGGCACTGTTGCTCC | Fw Bd. EF1 5’UTR |
| BE-9 | ATGAGGATCCGATTACAAGGTACCATTAATCTGCAAAGG | Rv Bd. EF1 5’UTR |
| BE-21 | ATGAAAGCTTGTTATACCGCTTTAAGCTGG | Fw Bd DHFR 3’UTR |
| BE-22 | ATGAGAATTCGTTGCGATATATATTGACTCTGTTTC | Rv Bd DHFR 3’UTR |
| BE-32 | ATGAACTAGTATATGTAATATAAAGGCTATGTGTATGCATC | Fw Bd Hsp90 3’UTR |
| BE-33 | ATGAGCGGCCGCCGCTGATGTGGCACTAGC | Rv Bd Hsp90 3’UTR |
| BE_124 | gcagattaatggtaccttgtaatcctcgagATGGACTATAAGGACCACGACGG | Fw Cas9 |
| BE_125 | acacatagcctttatattacatatactagtTTACTTTTTCTTTTTTGCCTGGCCG | Rv Cas9 |
| BE_154 | ggttCTCCAGTCACAAGTTCTGTT | Fw Bd cas9 guide PKG gatekeeper mutation |
| BE_155 | aaacAACAGAACTTGTGACTGGAG | Rv Bd cas9 guide PKG gatekeeper mutation |
| BE_213 | tgggatatattagccgtatcGTTTGGCCGATGTATGGTCCTTTGG | Fw PKG HR1 for tagging |
| BE_214 | acatcgtaagggtaaccggtAAAATCAAGTTCCCAgTCcTCGTCTGTGAGaTCTTC | Rv PKG HR1 for tagging |
| BE_215 | GAAATCACATGATCTgtcgacACATAGTTATGAAGCAACTGATTGTGAGC | Fw PKG HR2 for tagging |
| BE_216 | ctcactatagaattcttaattaaCAAACGTGACAGATGGCATCTGAACC | Rv PKG HR2 for tagging |
| BE_221 | ggttAGACCTCACAGACGAAGATT | Fw Cas9 Guide for PKG tagging |
| BE_222 | aaacAATCTTCGTCTGTGAGGTCT | Rv Cas9 Guide for PKG tagging |
| BE_494 | tgggatatattagccgtatcctaggCGGATAATGCTCCAGCAGTCG | Fw HR1 BdPLP1 |
| BE_495 | acatcgtaagggtaaccggtTTGTTTGCGGTCTGATAGTTCTGGT | Rv HR1 BdPLP1 |
| BE_496 | gaaatcacatgatctgtcgacTCGCACTGTCATGTACCATAGATTTAAACG | Fw HR2 BdPLP1 |
| BE_497 | ctcactatagaattcttaattaaTGATGTGACTCTTGCACATACAGC | Rv HR2 BdPLP1 |
| BE_500 | tgggatatattagccgtatcctaggcagAATGAGATAGCGGTATCCTGC | Fw HR1 BdPLP3 |
| BE_501 | acatcgtaagggtaaccggtTGTTTTAATGTTGTTaGTgTCGGCAC | Rv HR1 BdPLP3 |
| BE_502 | gaaatcacatgatctgtcgacCATCCAAAAGTATCACAATCACGACG | Fw HR2 BdPLP3 |
| BE_503 | ctcactatagaattcttaattaaACAGCAGAAGACTAAGTGTTCATACG | Rv HR2 BdPLP3 |
| BE_506 | tgggatatattagccgtatcctaggCCTTTGAAGTGCTAAACATGGAGG | Fw HR1 BdCDPK5 |
| BE_507 | acatcgtaagggtaaccggtGTCTAATGTGGCTACATCTCCGG | Rv HR1 BdCDPK5 |
| BE_508 | gaaatcacatgatctgtcgacCTCATTCAAACTAAGATGTACACTACGTTTACAC | Fw HR2 BdCDPK5 |
| BE_509 | ctcactatagaattcttaattaaTGCATTGGGTTCCCTTTTCCC | Rv HR2 BdCDPK5 |
| BE_512 | tgggatatattagccgtatcctaggTCACGCAGAAACTCTCACAAGC | Fw HR1 BdCDPK4 |
| BE_513 | acatcgtaagggtaaccggtAACgAATCTTGTCAACATGGCC | Rv HR1 BdCDPK4 |
| BE_514 | gaaatcacatgatctgtcgacAAATTTTTCAATAAATGGCAATAGCTTATCAC | Fw HR2 BdCDPK4 |
| BE_515 | ctcactatagaattcttaattaaGTGTAGATTTTGTCTTTGCCTATCG | Rv HR2 BdCDPK4 |
| BE_516 | ggttCAAGGCCATGTTGACAAGAT | Guide fw BdCDPK4 |
| BE_517 | aaacATCTTGTCAACATGGCCTTG | Guide rv BdCDPK4 |
| BE_518 | tgggatatattagccgtatcctaggGCGACTATAAAGCTGACAGACTTTGG | Fw HR1 BdCDPK7 |
| BE_519 | acatcgtaagggtaaccggtCTCCTCAACaGTGCCCAG | Rv HR1 BdCDPK7 |
| BE_520 | gaaatcacatgatctgtcgacATGCCTAAGCGCCGTCG | Fw HR2 BdCDPK7 |
| BE_521 | ctcactatagaattcttaattaaGTGACAGAGATTCAAGCTTGTACAGG | Rv HR2 BdCDPK7 |
| BE_524 | tgggatatattagccgtatcctaggGCACATACACTCTATGTGGTACTCC | Fw HR1 BdPKAc1 |
| BE_525 | acatcgtaagggtaaccggtCCAGTTgTCaAAGGGGTCGG | Rv HR1 BdPKAc1 |
| BE_526 | gaaatcacatgatctgtcgacTACTGTGAAAGTTCACGCAGAATTCC | Fw HR2 BdPKAc1 |
| BE_527 | ctcactatagaattcttaattaaTGCATGAGTTGTTCAGAGTCAAACG | Rv HR2 BdPKAc1 |
| BE_530 | tgggatatattagccgtatcctaggAACGCACGATTACCTTGCTCC | Fw HR1 BdPKAc2 |
| BE_531 | acatcgtaagggtaaccggtAACGTAAACGGCTCTGAGAAACG | Rv HR1 BdPKAc2 |
| BE_532 | gaaatcacatgatctgtcgacCGGCATCATATTTTGCCTGAAATTTGG | Fw HR2 BdPKAc2 |
| BE_533 | ctcactatagaattcttaattaaCCTGCACGGGAAAATGTCGC | Rv HR2 BdPKAc2 |
| BE_534 | ggttTCAGAGCCGTTTACGTTTAG | Guide fw BdPKAc2 |
| BE_535 | aaacCTAAACGTAAACGGCTCTGA | Guide rv BdPKAc2 |
| BE_536 | ACCGGTTACCCTTACGATGTTCCTGACTATGC | Fw 1xHA (Bd) for Knockdown tags. Universal for all. |
| BE_537 | gtcgacAGATCATGTGATTTCTCTTTGTTCAAGG | Rv glmS (Bd) for Knockdown tags. Universal for all. |
| BE_550 | CCTAGGATACGGCTAATATATCCCATC | Rv Bd U6 terminator – for universal use with guide PCR |
| BE_551 | CAAGTATCGATACAGGGAGGTTGACAGTGCGATCATTGTTTGgttttagagctaGAAAtagcaagttaaaataagg | PLP1 guide |
| BE_552 | CAAGTATCGATACAGGGAGGTTTGTTTTAATGTTGTTCGTATgttttagagctaGAAAtagcaagttaaaataagg | PLP3 guide |
| BE_553 | CAAGTATCGATACAGGGAGGTTCAAGGCCATGTTGACAAGATgttttagagctaGAAAtagcaagttaaaataagg | CDPK4 guide |
| BE_554 | CAAGTATCGATACAGGGAGGTTTTGAATGAGTTAGTCTAATGgttttagagctaGAAAtagcaagttaaaataagg | CDPK5 guide |
| BE_555 | CAAGTATCGATACAGGGAGGTTGCTTAGGCATCACTCCTCAAgttttagagctaGAAAtagcaagttaaaataagg | CDPK7 guide |
| BE_556 | CAAGTATCGATACAGGGAGGTTACAGTATCACCAGTTATCGAgttttagagctaGAAAtagcaagttaaaataagg | PKAc1 guide |
| BE_557 | CAAGTATCGATACAGGGAGGTTTCAGAGCCGTTTACGTTTAGgttttagagctaGAAAtagcaagttaaaataagg | PKAc2 guide PCR (or Gibson ssODN) |
| BE_558 | CAAGTATCGATACAGGGAGGTTATCTGCTGAACAAGGTTACAgttttagagctaGAAAtagcaagttaaaataagg | PhoD guide PCR (or Gibson ssODN) |
| BE_563 | CAAGTATCGATACAGGGAGGTTGAGTCTATTTTGCATTATTCgttttagagctaGAAAtagcaagttaaaataagg | Guide Asp2 |
| BE_564 | tgggatatattagccgtatcctaggTTCGGATGATGCCAGTTGTCG | Fw HR1 Asp2 |
| BE_565 | acatcgtaagggtaaccggtTTTTGCATTATTCCGGTGCTTGG | Rv HR1 Asp2 |
| BE_566 | gaaatcacatgatctgtcgacACTCTTAATTTCAACATGTCGTGCG | Fw HR2 Asp2 |
| BE_567 | ctcactatagaattcttaattaaGGCAACCACTTCAAAGTTTGC | Rv HR2 Asp2 |
| BE_568 | CAAGTATCGATACAGGGAGGTTTATGCATCCATAGGATCATAgttttagagctaGAAAtagcaagttaaaataagg | Guide Asp3 |
| BE_569 | tgggatatattagccgtatcctaggAGTTGTTCGCGAGCACTATTGG | Fw HR1 Asp3 |
| BE_570 | acatcgtaagggtaaccggtGTAGTGTCTTGACGATGCAATCC | Rv HR1 Asp3 |
| BE_571 | gaaatcacatgatctgtcgacTGTATATATACtATATGATCCTATGGATGCATAC | Fw HR2 Asp3 |
| BE_572 | ctcactatagaattcttaattaaACAGCTACATGAGTCAGTAGAAAGG | Rv HR2 Asp3 |
| BE_573 | CAAGTATCGATACAGGGAGGTTTAATTAGTTATGTTTTAATAgttttagagctaGAAAtagcaagttaaaataagg | Guide DPAP1 |
| BE_574 | tgggatatattagccgtatcctaggCATACCTAACAGGAAAACGCATGC | Fw HR1 DPAP1 |
| BE_575 | acatcgtaagggtaaccggtTGTTTTAATATGGTTGTGTACATCGTGTAG | Rv HR1 DPAP1 |
| BE_576 | gaaatcacatgatctgtcgacCTAATTAATCGTGTTTTAAAATGCAACACGAC | Fw HR2 DPAP1 |
| BE_577 | ctcactatagaattcttaattaaGTAATGCTCCTTTATCTCCTTCCACATG | Rv HR2 DPAP1 |
| BE_596 | ACCTGAAACTCACGGACTTCG | Fw test PKAc1 tag Integration |
| BE_597 | CGAACCACTCCCGTATATGTCC | Rv test PKAc1 tag Integration |
| BE_598 | ACTTTGGTTTTGCCAAGCACG | Fw test PKAc2 tag Integration |
| BE_599 | GATGGCTGGTCATACAGTGC | Rv test PKAc2 tag Integration |
| BE_600 | GGAAAGGAAAAGTGTGTGGCG | Fw test PLP1 tag Integration |
| BE_601 | TCGCCTCAAACGCGGATTCC | Rv test PLP1 tag Integration |
| BE_602 | AAGACAAACATgtaaggagttgtgc | Fw test PLP3 tag Integration |
| BE_603 | TCTCGTATGCCAGTATGAAGTGC | Rv test PLP3 tag Integration |
| BE_604 | CATTATGTTTGGAGGTGCTGATGC | Fw test Asp2 tag Integration |
| BE_605 | CACAACAAGTCTCAAGATGAATAGGAGC | Rv test Asp2 tag Integration |
| BE_606 | GTTTGGTGGAGTGGATCCAAGG | Fw test Asp3 tag Integration |
| BE_607 | AGGTTTCATGAAGCTTTTGGTTTCG | Rv test Asp3 tag Integration |
| BE_608 | ACCTGCGATATGTTCAACCAGG | Fw test DPAP1 tag Integration |
| BE_609 | GATTTACTTCTTCTGCACGAGTGC | Rv test DPAP1 tag Integration |
| BE_610 | CATCAAACAGGTGCTCAGTGG | Fw test CDPK4 tag Integration |
| BE_611 | CAAAAGGCTGCATCTGGTATGC | Rv test CDPK4 tag Integration |
| BE_612 | GTAATGCGGCAGATCTTTTCTGC | Fw test CDPK5 tag Integration |
| BE_613 | GAACCACTTCCAAACCCCTGG | Rv test CDPK5 tag Integration |
| BE_614 | TCGTGAATTTTACGTGGCTTCTAGG | Fw test CDPK7 tag Integration |
| BE_615 | ATCAGTTGGTCAACACGTGGC | Rv test CDPK7 tag Integration |
| BE_179 | GCACGGTTGGTTTTTTAATACACCG | Fw test PKG gatekeeper Integration |
| BE_180 | ACCAAGTATGATTTCAGGTGCC | Rv test PKG gatekeeper Integration |
|  |  |  |
| Synthesis 1 | gagtcaatatatatcgcaacgaattctctagaGTGGTGTTAATTCATCGCTAGTAACCATATACGAGGGCATAGACAAGTCCTTCCACACGTGCATAGCCGCATTGGCTAGTAAGCTAAATATAGAGCAGATTTATGTCACCTTCAATTATTCTTTCTCAGCATGAATGTCACCTGTTTATGTCATAGTACGGCATAAACAGGCACGGCAATGGCACGGTCACCTTCTACATCACCAAACTACAATTGAAGTACAACAACAAAGTCAACTAATGAAGGTCTCCTCTATATCAAAGAGCGAGTCGTGTAGAGATAGTGATCCTCCGAAACTATTAAATGAAACCAGATATAGTGAAATGCTGTCCAACGTGCAGAAATAACCTTGCTTCATGATGTTTGGCAGCTCCCATATAGATCTGTACCATTTCAAACATTTTTATATGGCCATTTTTCTATTATATGTCGCATTGATCCTTATCCTTAATTTTGCATCCCCACGGTGGTACCTGTTGAGTGAGAGTCCCACTCCCCACAAGTATCGATACAGGGAGGTTggGTCTTCgaGAAGACctgttttagagctaGAAAtagcaagttaaaataaggctagtccgttatcaacttgaaaaagtggcaccgagtcggtgcTTTTTTTTTTGCATCTTTGCACAGAATATATCAATGATGGGATATATTAGCCGTATCCTAGGTATAGGAACTTTCGGGACCGTTAAATTGGTAGAGCATGAGGCCACAGGTGTAAGATTTGCTTTGAAGTGTGTTAGTAGGAAATGTATCCGTGCACTCAAGCAAGAGAAGCATATCAAGTTGGAAAGAGAAATAATGGCTCAGAATGACCATCCATTCATCGTTCAACTAGGTAATTGGTGCCGTGCCTTAAGCTAAATACTCTGCAGTAAAAACATTcAAaGAcGCTGATAATGTCTACTTtCTAcaAGAACTaGTGACTGGAGGTGAATTGTACGATGCAATCAGAAAAATTGGGTTGCTTTCGAGGTCTCAAGCACAATTTTACATAGCATCTATCGTCCTAGCATTCGAGTATTTGCATGAAAGACAAATCGCATATCGAGTAGGTTCAGAAGCTAAATGATTAATGCTTTCATAGGATTTGAAACCTGAAAATATACTTCTCGATGAACAGGGCTATATCAAACTGATTGATTTCGGATGTGCAAAAAAAATTAAAGAGGGCCTTAATTAAgaattctatag | BdU6 promoter-guide cloning -PKG gatekeeper HR |
