# Supplementary material for: Babesia divergens egress from host cells is orchestrated by essential and druggable kinases and proteases
Source: Research Square preprint supplement (doi:10.21203/rs.3.rs-2553721/v1), 2023-02-28
Supplement: Supplementary file 2 [file 58e968623a9a8efe14445f52.xlsx]

## Sheet: Known egress invasion genes
Bd Gene ID	Tg Gene ID	Pf Gene ID	Bioogical role	Molecular function	Babesia divergens annotation (this paper)		Pf Gene	Plasmodium berghei ookinete miconeme proteomic evidence (Lal et al, 2009, Proteomics)	Plasmodium falciparum sporozoite surface proteomic evidence (Swearingen, 2016, Plos Pathogens)	Tg Gene	Putative localization in Bd (based on expression profile)	Tg Proteomic localization	Likely role in egress/invasion (based on orthology)	Time of maximum expression in Babesia divergens (hpi)	Time of minimum expression in Babesia divergens (hpi)	Peak expression level in Babesia divergens (CPM)	Minimum expression level in Babesia divergens (CPM)	Fold Change in expression in Babesia divergens
Bdiv_007890	TGME49_209030	PF3D7_1246200	Invasion/motility	Glideosome	actin		ACT1	No	No	actin ACT1	IMC	cytosol	yes	12	2.20408	3643.52	1177.66	3.09387
Bdiv_021160	TGME49_220400	PF3D7_0503400	Invasion/motility	Glideosome	Actin depolymerizing factor / Cofilin		ADF1	No	No	ADF	IMC	cytosol	yes	8.57143	2.44898	440.027	290.261	1.51597
Bdiv_013230	TGME49_236040	PF3D7_1444800	Invasion/motility	Glideosome	Aldolase		FBPA	No	No	fructose-1,6-bisphosphate aldolase	IMC	cytosol	yes	0	4.40816	1221.19	920.146	1.32717
Bdiv_001550	TGME49_310030	PF3D7_0105300	Invasion/motility	Glideosome	CAP (actin interaction)		CAP	No	No	cyclase-associated protein, putative		PM - peripheral 2	yes	12	2.44898	332.229	170.076	1.95341
Bdiv_008920c	TGME49_206430	PF3D7_0530900	Invasion/motility	Glideosome	Formin 1		FRM1	No	No	FRM1	IMC	N/A	yes	5.87755	0	297.651	88.4316	3.36589
Bdiv_005880c	TGME49_206580	PF3D7_1219000	Invasion/motility	Glideosome	Formin 2		FRM2	No	No	FRM2	IMC	nucleus - chromatin	yes	1.71429	12	363.855	274.486	1.32558
Bdiv_010140c	TGME49_249850	PF3D7_0515700	Invasion/motility	Glideosome	GAP40		GAP40	No	No	GAP40	IMC	IMC	yes	7.34694	0	1655.48	469.699	3.52456
Bdiv_002420	TGME49_223940	PF3D7_1222700	Invasion/motility	Glideosome	GAP45		GAP45	No	No	GAP45	IMC	IMC	yes	8.32653	0.979592	647.489	88.185	7.34239
Bdiv_020490	TGME49_219320	PF3D7_0918000	Invasion/motility	Glideosome	GAP50		GAP50	Yes	Yes	GAP50	IMC	IMC	yes	7.10204	0	1112.38	334.527	3.32523
Bdiv_010720	TGME49_289690	PF3D7_1462800	Invasion/motility	Glideosome	GAPDH		GAPDH	No	No	GAPDH1	IMC	cytosol	yes	0	6.85714	6423.14	3785.88	1.6966
Bdiv_039980c	TGME49_202510	PF3D7_1323700	Invasion/motility	Glideosome	GAPM1		GAPM1	No	No	multi-pass transmembrane protein	IMC	N/A	yes	7.83673	0	772.628	166.454	4.6417
Bdiv_023730	TGME49_206690	PF3D7_0423500	Invasion/motility	Glideosome	GAPM2		GAPM2	No	No	GAPM2B	IMC	IMC	yes	6.61224	0	896.256	286.854	3.12443
Bdiv_032630c	TGME49_271970	PF3D7_1406800	Invasion/motility	Glideosome	GAPM3		GAPM3	No	No	GAPM3	IMC	IMC	yes	7.34694	0	869.11	232.808	3.73317
Bdiv_038310	TGME49_257680	PF3D7_1246400	Invasion/motility	Glideosome	MTIP (Myosin interacting protein - low confidence)		MTIP	No	No	myosin light chain MLC1	IMC	IMC	yes	8.32653	1.71429	572.685	222.062	2.57894
Bdiv_001770c	TGME49_235470	PF3D7_1342600	Invasion/motility	Glideosome	Myosin A		MyoA	No	No	myosin A	IMC	IMC	yes	12	1.46939	1340.58	414.748	3.23227
Bdiv_024680	TGME49_243250	NA	Invasion/motility	Glideosome	Myosin B		NA	NA	NA	myosin H	IMC	apical 2	yes	5.87755	0	326.231	70.7707	4.60969
Bdiv_023820c	TGME49_278870	PF3D7_1329100	Invasion/motility	Glideosome	Myosin F		MyoF	No	No	myosin F	IMC	PM - peripheral 2	yes	6.12245	0	506.091	216.962	2.33262
Bdiv_003910c	TGME49_293690	PF3D7_0932200	Invasion/motility	Glideosome	Profilin		PFN	No	No	PRF	IMC	cytosol	yes	12	2.44898	686.933	226.136	3.0377
Bdiv_023990c	TGME49_300130	PF3D7_1133400	Invasion/motility	Ligand	AMA1		AMA1	No	Yes	AMA1	Microneme	N/A	yes	12	2.44898	1204.56	128.64	9.36381
Bdiv_033780	NA	NA	Invasion/motility	Ligand	Bd37		NA	NA	NA	NA			yes	12	2.69388	457.218	225.163	2.03061
Bdiv_010240c	TGME49_265790	PF3D7_1030200	Invasion/motility	Ligand	CLAMP		CLAMP	No	No	CLAMP	Microneme	micronemes	yes	12	2.44898	377.421	44.8798	8.40958
Bdiv_018780	TGME49_243930	PF3D7_0828800	Invasion/motility	Ligand	GAMA		GAMA	No	No	hypothetical protein	Microneme	micronemes	yes	11.5102	2.20408	806.722	38.2558	21.0876
Bdiv_022630	NA	NA	Invasion/motility	Ligand	RAP1a		NA	NA	NA	N/A	Rhoptry		yes	6.36735	0	300.328	18.2575	16.4495
Bdiv_025600	NA	NA	Invasion/motility	Ligand	RAP1b		NA	NA	NA	N/A	Rhoptry		yes	6.61224	0	8270.66	322.162	25.6724
Bdiv_000370c	TGME49_300100	PF3D7_1452000	Invasion/motility	Ligand	RON2		RON2	No	Yes	RON2	Rhoptry	rhoptries 1	yes	6.12245	0	1330.39	78.2609	16.9995
Bdiv_016330	TGME49_229010	PF3D7_1116000	Invasion/motility	Ligand	RON4		RON4	No	No	RON4	Rhoptry	rhoptries 1	yes	5.63265	0	1317.51	328.678	4.00851
Bdiv_025310	TGME49_311470	PF3D7_0817700	Invasion/motility	Ligand	RON5		RON5	No	No	RON5	Rhoptry	rhoptries 1	yes	6.12245	0	1541.9	259.346	5.94534
Bdiv_023070c	NA	NA	Invasion/motility	Ligand	RRA (RAP1 associated protein)		NA	NA	NA	N/A	Rhoptry		yes	6.36735	0	93.6646	15.5958	6.00576
Bdiv_010490	TGME49_201780	PF3D7_1335900	Invasion/motility	Ligand	TRAP1		TRAP (unamed)	No	Yes	MIC2	Microneme	micronemes	yes	12	0	29.0512	21.297	1.3641
Bdiv_010470	NA	NA	Invasion/motility	Ligand	TRAP2 (aka P18)		NA	NA	NA	NA	Micorneme		yes	12	2.44898	2273.68	243.957	9.32003
Bdiv_004480c	TGME49_218310	PF3D7_0822700	Invasion/motility	Ligand	TRAP3		TRP1	No	No	MIC14	Microneme	N/A	yes	7.83673	2.20408	63.3628	37.5014	1.68961
Bdiv_020650	TGME49_277910	NA	Invasion/motility	Ligand	TRAP4		NA	NA	NA	thrombospondin type 1 domain-containing protein	Microneme	micronemes	yes	6.61224	0	237.069	121.415	1.95255
Bdiv_004450	TGME49_223480	NA	Invasion/motility	Ligand	TRAP5		NA	NA	NA	sushi domain (scr repeat) domain-containing protein	Microneme	N/A	yes	3.18367	10.7755	473.604	281.902	1.68003
Bdiv_023140c	NA	NA	Protease	Aspartyl Protease	ASP2		NA	NA	NA	NA	Rhoptry		yes	6.36735	0	293.484	26.9977	10.8707
Bdiv_006490c	TGME49_246550	PF3D7_0808200	Protease	Aspartyl Protease	ASP3		PMX	Yes	No	ASP3	Microneme	rhoptries 2	yes	12	2.44898	1041.15	143.271	7.26701
Bdiv_039880	TGME49_242720	PF3D7_1323500	Protease	Aspartyl Protease	Asp5		PMV	No	No	ASP5		Golgi	No	5.87755	0.979592	5.21776	2.90614	1.79542
Bdiv_036520	TGME49_262940	PF3D7_0311700	Protease	Aspartyl Protease	Eukaryotic aspartyl protease		PMVI	No	No	aspartyl proteinase (eimepsin), putative		N/A	No	4.16327	10.5306	117.088	90.7882	1.28969
Bdiv_022420c	TGME49_272510	PF3D7_1033800	Protease	Aspartyl Protease	Eukaryotic aspartyl protease		PMVII	No	No	aspartyl protease		N/A	No	2.69388	8.81633	125.362	86.4522	1.45007
Bdiv_014760	TGME49_234220	PF3D7_1018300	Protease	Aspartyl Protease	NA		N/A	No	No	hypothetical protein		Golgi	No	10.5306	7.59184	161.763	136.7	1.18334
Bdiv_017150c	TGME49_304680	PF3D7_1409300	Protease	Aspartyl Protease	Putative serine esterase (DUF676);Aspartyl protease		DDI1	No	No	ubiquitin family protein		cytosol	No	12	2.69388	1015.2	781.149	1.29963
Bdiv_033850	TGME49_293820	PF3D7_1362400	Protease	Cysteine Protease	Calpain family cysteine protease;Calpain large subunit, domain III		Pcalp	No	No	calpain family cysteine protease domain-containing protein		PM - peripheral 2	No	0	9.55102	166.556	135.846	1.22606
Bdiv_037850	TGME49_232360	NA	Protease	Cysteine Protease	Exonuclease		NA	NA	NA	exonuclease		N/A	No	0	10.5306	191.835	148.117	1.29516
Bdiv_016030c	TGME49_243510	PF3D7_0923100	Protease	Cysteine Protease	OTU-like cysteine protease		OTU domain-containing protein, putative	No	No	OTU family cysteine protease		NA	No	4.16327	12	85.3919	69.0301	1.23702
Bdiv_016860c	NA	NA	Protease	Cysteine Protease	Papain family cysteine protease		NA	NA	NA	NA			yes	7.10204	1.71429	12.2115	7.29337	1.67433
Bdiv_008170c	TGME49_267490	PF3D7_1247800	Protease	Cysteine Protease	Papain family cysteine protease;Cathepsin C exclusion domain		DPAP2	No	No	preprocathepsin c precursor, putative	Microneme	N/A	yes	2.93878	10.5306	67.8068	35.2596	1.92307
Bdiv_030030	NA	NA	Protease	Cysteine Protease	Papain family cysteine protease;Cathepsin C exclusion domain		NA	NA	NA	NA	Micorneme		yes	11.7551	1.46939	555.556	65.1662	8.52521
Bdiv_017270c	NA	NA	Protease	Cysteine Protease	Papain family cysteine protease;Cathepsin propeptide inhibitor domain (I29)		NA	NA	NA	NA			yes	2.44898	11.0204	393.105	295.909	1.32847
Bdiv_006310	TGME49_321530	PF3D7_1115400	Protease	Cysteine Protease	Papain family cysteine protease;Cathepsin propeptide inhibitor domain (I29)		FP3	No	No	CPL		endomembrane vesicles	yes	0	7.83673	234.264	126.245	1.85563
Bdiv_002350c	NA	NA	Protease	Cysteine Protease	Peptidase family C54		NA	NA	NA	NA			No	8.32653	1.95918	38.4171	21.9191	1.75268
Bdiv_032410	TGME49_216020	NA	Protease	Cysteine Protease	Peptidase family C78		NA	NA	NA	peptidase family c78 protein		ER	No	10.0408	0	107.633	74.1634	1.45129
Bdiv_027500c	TGME49_301222	PF3D7_1432600	Protease	Cysteine Protease	Transglutaminase-like superfamily;Rad4 beta-hairpin domain 1;Rad4 beta-hairpin domain 3		conserved Plasmodium protein, unknown function	No	No	DNA repair protein Rad4 domain-containing protein		N/A	No	0	6.12245	133.301	93.7716	1.42155
Bdiv_016960c	NA	NA	Protease	Cysteine Protease	Ubiquitin carboxyl-terminal hydrolase		NA	NA	NA	NA			yes	0	7.34694	210.386	172.39	1.22041
Bdiv_035450	TGME49_226940	PF3D7_1414700	Protease	Cysteine Protease	Ubiquitin carboxyl-terminal hydrolase		ubiquitin carboxyl-terminal hydrolase, putative	No	No	ubiquitin carboxyl-terminal hydrolase		N/A	No	5.87755	0	326.086	206.485	1.57922
Bdiv_019770	TGME49_289330	PF3D7_0726500	Protease	Cysteine Protease	Ubiquitin carboxyl-terminal hydrolase		ubiquitin carboxyl-terminal hydrolase, putative	No	No	ubiquitin carboxyl-terminal hydrolase family 2 protein		NA	No	0	9.06122	723.244	403.736	1.79138
Bdiv_039860c	TGME49_277895	PF3D7_0104300	Protease	Cysteine Protease	Ubiquitin carboxyl-terminal hydrolase		UBP1	No	No	ubiquitin carboxyl-terminal hydrolase		NA	No	5.87755	0.979592	50.6555	24.7639	2.04554
Bdiv_016680c	TGME49_263470	PF3D7_1460400	Protease	Cysteine Protease	Ubiquitin carboxyl-terminal hydrolase, family 1		UCHL3	No	No	UCHL3		cytosol	No	7.83673	0	99.7692	58.2175	1.71373
Bdiv_028810	TGME49_213870	PF3D7_0413900	Protease	Cysteine Protease	Ubiquitin carboxyl-terminal hydrolase;UBA/TS-N domain;Zn-finger in ubiquitin-hydrolases and other protein		USP13	No	No	UBA/TS-N domain-containing protein		cytosol	No	0	7.83673	217.845	135.953	1.60235
Bdiv_002710	TGME49_294360	PF3D7_1317000	Protease	Cysteine Protease	Ubiquitin carboxyl-terminal hydrolase;Zn-finger in ubiquitin-hydrolases and other protein		USP39	No	No	ubiquitin specific protease 39 isoform 2, putative		nucleus - non-chromatin	No	10.2857	0	192.47	157.193	1.22442
Bdiv_032940	TGME49_311090	PF3D7_0527200	Protease	Cysteine Protease	Ubiquitin family;Ubiquitin carboxyl-terminal hydrolase		USP14	No	No	ubiquitin carboxyl-terminal hydrolase		cytosol	No	3.18367	0	216.738	178.428	1.21471
Bdiv_009150	TGME49_214470	PF3D7_1233900	Protease	Cysteine Protease	Ulp1 protease family, C-terminal catalytic domain		SENP1	No	No	Ulp1 protease family, C-terminal catalytic domain-containing protein		nucleus - chromatin	No	1.71429	7.83673	243.281	141.021	1.72514
Bdiv_028830c	TGME49_290840	PF3D7_0807700	Protease	Serine Protease	DegP		DegP	No	No	serine protease		mitochondrion - soluble	No	6.12245	0	70.9824	36.4699	1.94633
Bdiv_001980c	TGME49_245590	PF3D7_1345200	Protease	Serine Protease	Rhomboid family		ROM6	No	No	ROM6		N/A	yes	7.59184	1.95918	213.731	173.095	1.23476
Bdiv_004020c	TGME49_268590	PF3D7_0506900	Protease	Serine Protease	Rhomboid family		ROM4	No	No	ROM4		PM - integral	yes	4.16327	0	40.6134	32.2264	1.26025
Bdiv_003860c	NA	NA	Protease	Serine Protease	Rhomboid family		NA	NA	NA	NA			yes	2.20408	8.08163	1325.78	1046.25	1.26717
Bdiv_018310	NA	PF3D7_1358300	Protease	Serine Protease	Rhomboid family		ROM7	No	No	NA			yes	1.95918	10.0408	157.138	119.637	1.31346
Bdiv_003990	NA	NA	Protease	Serine Protease	Rhomboid family		NA	NA	NA	NA			yes	12	0	9.48196	4.57271	2.0736
Bdiv_027380	NA	PF3D7_1411200	Protease	Serine Protease	Rhomboid family		ROM8	No	No	NA			yes	7.59184	0	188.866	65.2509	2.89446
Bdiv_004000c	TGME49_204050	PF3D7_0507500	Protease	Serine Protease	SUB1		SUB1	No	No	SUB1	Microneme	micronemes	yes	12	3.42857	23.3189	15.4765	1.50673
Bdiv_013880c	TGME49_204130	PF3D7_0923300	RBC lysis	Perforin-like	PLP1 (TgPLP1 PfPLP3)	PLP1	PLP3	No	No	PLP1	Microneme	micronemes	yes	12	1.46939	439	24.1116	18.207
Bdiv_014980	NA	NA	RBC lysis	Perforin-like	PLP5	PLP2	NA	NA	NA	NA			yes	1.71429	5.38776	30.4689	24.294	1.25417
Bdiv_018170c	NA	NA	RBC lysis	Perforin-like	PLP9	PLP3	NA	NA	NA	NA			yes	7.83673	1.95918	4.45566	2.91098	1.53064
Bdiv_011150	NA	NA	RBC lysis	Perforin-like	PLP3	PLP4	NA	NA	NA	NA	Rhoptry		yes	6.12245	0.244898	15.0713	6.06636	2.4844
Bdiv_011160c	NA	NA	RBC lysis	Perforin-like	PLP4	PLP5	NA	NA	NA	NA			yes	12	1.71429	14.5212	8.46451	1.71554
Bdiv_018050c	NA	NA	RBC lysis	Perforin-like	PLP6	PLP6	NA	NA	NA	NA			yes	6.12245	0.734694	10.3069	2.99755	3.43843
Bdiv_018160c	NA	NA	RBC lysis	Perforin-like	PLP8	PLP7	NA	NA	NA	NA			yes	7.83673	11.0204	4.56629	3.02141	1.51131
Bdiv_018150c	NA	NA	RBC lysis	Perforin-like	PLP7	PLP8	NA	NA	NA	NA			yes	10.5306	0	11.8175	6.30038	1.87568
Bdiv_004680	NA	NA	RBC lysis	Perforin-like	PLP2	PLP9	NA	NA	NA	NA			yes	0	8.32653	19.4524	11.4894	1.69307
Bdiv_038680c	TGME49_240910	PF3D7_1243900	Signaling	Calcium responsive	DOC2		DOC2	No	No	DOC2		NA	yes	7.59184	0	186.182	59.7134	3.11793
Bdiv_035940c	TGME49_224950	PF3D7_1337800	Signaling	Kinase	CDPK5		CDPK5	No	No	CDPK5		N/A	yes	7.83673	2.44898	245.815	187.963	1.30779
Bdiv_030560	TGME49_228750	PF3D7_1123100	Signaling	Kinase	CDPK7		CDPK7	No	No	CDPK7		nucleus - chromatin	yes	1.95918	11.0204	253.142	126.916	1.99455
Bdiv_014540c	NA	NA	Signaling	Kinase	CDPK (unamed)		NA	NA	NA	NA			yes	NA	NA	NA	NA	NA
Bdiv_024410	TGME49_305860	PF3D7_0717500	Signaling	Kinase	CDPK4		CDPK4	No	No	CDPK3		PM - peripheral 2	yes	11.5102	2.44898	598.24	236.671	2.52773
Bdiv_033990c	NA	NA	Signaling	Kinase	CamK (no EF-hands)		NA	NA	NA	NA			yes	NA	NA	NA	NA	NA
Bdiv_014900c	NA	NA	Signaling	Kinase	CamK (no EF-hands)		NA	NA	NA	NA			yes	0	10.7755	280.098	179.084	1.56406
Bdiv_035640	TGME49_226030	PF3D7_0934800	Signaling	Kinase	PKAc1		PKAc	No	No	PKAc1		IMC	yes	12	1.95918	729.702	248.331	2.93843
Bdiv_014290c	NA	NA	Signaling	Kinase	PKAc2		NA	NA	NA	NA			yes	0.244898	7.59184	47.8231	36.2213	1.3203
Bdiv_020500	TGME49_311360	PF3D7_1436600	Signaling	Kinase	PKG		PKG	No	No	PKG		PM - peripheral 2	yes	12	0	245.303	128.086	1.91514
Bdiv_002460	TGME49_242070	PF3D7_1223100	Signaling	Kinase regulation	PKAr		PKAr	No	No	PKAr		IMC	yes	8.32653	1.46939	563.423	209.736	2.68635
Bdiv_020680c	TGME49_249970	PF3D7_0414600	Signaling	Lipid signaling	APH		APH	No	No	APH		micronemes	yes	10.5306	1.46939	272.155	136.823	1.9891
Bdiv_037690c	TGME49_202460	PF3D7_1471400	Signaling	Lipid signaling	DGK1		DGK	No	No	DGK1		PM - peripheral 2	yes	8.08163	0	419.549	190.277	2.20494
Bdiv_034370	NA	PF3D7_0625000	Signaling	Lipid signaling	PAP		SMS1	No	No	PAP			yes	6.12245	0	40.2237	18.0548	2.22787
Bdiv_023830	TGME49_248830	PF3D7_1013500	Signaling	Lipid signaling	PI-PLC		PI-PLC	No	No	PIPLC		NA	yes	4.40816	0	224	143.565	1.56027
Bdiv_035380c	TGME49_310700	PF3D7_1414400	Signaling	Phosphatase	PP1		PP1	No	No	PP1		NA	yes	12	4.16327	536.924	482.505	1.11278

## Sheet: Putative egress invasion genes
BdGene	PfGene	TgGene	1:1 ortholg	B. divergens product description	Comment	B. divergens SigP	Lal.ookinete.microneme.evidence	observed.in.swearing.plasmodium.sporozoite	TgProteomic.localization	HighBdRON2.pearson	HighBdAMA1.pearson
Bdiv_000370c	PF3D7_1452000	TGME49_300100	All3	membrane protein, putative	RON2	Yes	NA	yes	rhoptries 1	yes	NA
Bdiv_000940c	PF3D7_0613300	TGME49_315220	All3	conserved hypothetical protein	ROP14	No	NA	NA	rhoptries 2	NA	NA
Bdiv_001220	PF3D7_0414900	TGME49_261440	All3	conserved hypothetical protein	ARO - rhop/nuclear	No	NA	NA	rhoptries 2	NA	NA
Bdiv_001570c	PF3D7_0912400	TGME49_265830	All3	membrane protein, putative		Yes	Yes		NA	NA	NA
Bdiv_001870c	PF3D7_1343700	TGME49_262150	All3	kelch repeat and K%2B channel tetramerisation domain containing protein		No	NA	NA	apical 1	NA	NA
Bdiv_001920	PF3D7_1344200	TGME49_226830	All3	DnaK family domain containing protein		Yes	Yes		NA	NA	NA
Bdiv_001940	PF3D7_1344800	TGME49_291640	All3	aspartate transcarbamoylase, putative		Yes	Yes		NA	NA	NA
Bdiv_002490c	PF3D7_1318700	TGME49_230340	All3	hypothetical protein		No	NA	NA	apical 1	NA	NA
Bdiv_002580c	PF3D7_1316400	TGME49_301420	All3	hypothetical protein		No	NA	NA	apical 1	NA	NA
Bdiv_003210	**PF3D7_1147800	**TGME49_205320	All3	200 kDa antigen p200	MAEBL merozoite adhesive erythrocytic binding protein. Low confidence	No	NA	NA	NA	NA	Yes
Bdiv_003380c	PF3D7_1237900	TGME49_228770	All3	hypothetical protein		Yes	Yes		NA	NA	NA
Bdiv_003440	PF3D7_1309000	TGME49_259172	All3	hypothetical protein		No	NA	NA	dense granules	NA	NA
Bdiv_003510c	PF3D7_1462300	TGME49_304990	All3	hypothetical protein		Yes	Yes		NA	NA	NA
Bdiv_004000c	PF3D7_0507500	TGME49_204050	All3	subtilisin-like protein, putative	SUB1	Yes	NA	NA	micronemes	NA	NA
Bdiv_004320	PF3D7_1352500	TGME49_247350	All3	Thioredoxin family protein		Yes	Yes		NA	NA	NA
Bdiv_004890c	PF3D7_1248500	TGME49_309560	All3	conserved hypothetical protein		No	NA	NA	rhoptries 2	NA	NA
Bdiv_004940c	PF3D7_1351700	TGME49_275670	All3	membrane skeletal protein, putative		No	NA	NA	apical 1	NA	NA
Bdiv_005110	PF3D7_0308100	TGME49_271880	All3	hypothetical protein		No	NA	NA	apical 2	NA	NA
Bdiv_005720c	PF3D7_1013300	TGME49_231130	All3	conserved hypothetical protein		Yes	Yes		NA	NA	NA
Bdiv_005970	PF3D7_1247300	TGME49_270220	All3	conserved hypothetical protein		Yes	NA	NA	NA	NA	NA
Bdiv_006490c	PF3D7_0808200	TGME49_246550	All3	aspartyl protease, putative	ASP3	Yes	Yes		rhoptries 2	NA	NA
Bdiv_007880c	PF3D7_0815300	TGME49_232540	All3	FAD binding domain containing protein		Yes	NA	NA	NA	NA	NA
Bdiv_009580c	PF3D7_1455800	TGME49_205658	All3	LCCL domain-containing protein CCP2, putative		Yes	Yes		NA	NA	NA
Bdiv_009910c	PF3D7_0721400	TGME49_243730	All3	p36 protein	ROP9	No	NA	NA	rhoptries 1	NA	NA
Bdiv_010100c	PF3D7_0517800	TGME49_256030	All3	conserved hypothetical protein		No	NA	NA	apical 1	NA	NA
Bdiv_010240c	PF3D7_1030200	TGME49_265790	All3	hypothetical protein		No	NA	NA	micronemes	NA	NA
Bdiv_010410c	PF3D7_0829100	TGME49_237260	All3	conserved hypothetical protein		No	NA	NA	apical 2	NA	NA
Bdiv_010490	PF3D7_1335900	TGME49_201780	All3	thrombospondin-related anonymous protein	TRAP2 (aka P18) (TgMIC2)	Yes	NA	yes	micronemes	NA	NA
Bdiv_011270c	PF3D7_0609800	TGME49_278850	All3	Palmitoyltransferase PFA3, related		Yes	NA	NA	NA	NA	NA
Bdiv_011450c	PF3D7_1105100	TGME49_305160	All3	histone 2B protein, putative		No	NA	NA	apical 2	NA	NA
Bdiv_011800	PF3D7_1463900	TGME49_230350	All3	membrane protein, putative	RON11	Yes	NA	NA	rhoptries 2	yes	NA
Bdiv_012330c	PF3D7_0718300	TGME49_261080	All3	GCC2 and GCC3 domain containing protein		No	NA	NA	micronemes	NA	NA
Bdiv_013120c	PF3D7_1361800	TGME49_312630	All3	conserved hypothetical protein	GAC (glidesome conector)	No	NA	NA	NA	NA	Yes
Bdiv_013320c	PF3D7_1011000	TGME49_260820	All3	conserved hypothetical protein		No	NA	NA	apical 1	NA	NA
Bdiv_013820c	PF3D7_1031200	TGME49_310440	All3	phosphatidylinositol-4-phosphate 5-kinase, putative		No	NA	NA	apical 2	NA	NA
Bdiv_013880c	PF3D7_0923300	TGME49_204130	All3	MAC/perforin domain containing protein	PLP1 (TgPLP1 PfPLP3)	No	NA	NA	micronemes	NA	NA
Bdiv_015190	PF3D7_1444300	TGME49_240860	All3	acyltransferase family protein	(Pf ISP1)	Yes	Yes		NA	NA	NA
Bdiv_016060	PF3D7_1141300	TGME49_208340	All3	hypothetical protein		No	NA	NA	apical 2	NA	NA
Bdiv_016330	PF3D7_1116000	TGME49_229010	All3	hypothetical protein	RON4	Yes	NA	NA	rhoptries 1	NA	NA
Bdiv_017800	PF3D7_1128900	TGME49_223790	All3	hypothetical protein		No	NA	NA	apical 1	NA	NA
Bdiv_017880	PF3D7_1025700	TGME49_320005	All3	conserved hypothetical protein		Yes	NA	NA	NA	NA	NA
Bdiv_018420c	PF3D7_0609100	TGME49_225530	All3	conserved hypothetical protein		Yes	NA	NA	NA	NA	NA
Bdiv_018840c	PF3D7_0407100	TGME49_247920	All3	hypothetical protein		Yes	NA	NA	NA	NA	NA
Bdiv_019030	PF3D7_0827900	TGME49_211680	All3	protein disulfide-isomerase		Yes	NA	yes	NA	NA	NA
Bdiv_019420c	PF3D7_1204400	TGME49_254670	All3	hypothetical protein, conserved		Yes	NA	NA	NA	NA	NA
Bdiv_020490	PF3D7_0918000	TGME49_219320	All3	acid phosphatase, putative	GAP50	Yes	Yes	yes	NA	yes	NA
Bdiv_020670	PF3D7_1244200	TGME49_214520	All3	hypothetical protein, conserved		No	NA	NA	apical 2	NA	NA
Bdiv_020680c	PF3D7_0414600	TGME49_249970	All3	conserved hypothetical protein		No	NA	NA	micronemes	NA	NA
Bdiv_023170	PF3D7_1430700	TGME49_293180	All3	glutamate dehydrogenase, putative		No	NA	yes	NA	NA	NA
Bdiv_023270	PF3D7_1431500	TGME49_233010	All3	mitogen activated protein kinase, putative		No	NA	NA	dense granules	NA	NA
Bdiv_023990c	PF3D7_1133400	TGME49_300130	All3	apical membrane antigen 1		Yes	NA	yes	NA	NA	NA
Bdiv_024700	PF3D7_0214900	TGME49_297960	All3	conserved hypothetical protein	RON6	Yes	NA	NA	rhoptries 1	yes	NA
Bdiv_025310	PF3D7_0817700	TGME49_311470	All3	membrane protein, putative	RON5	Yes	NA	NA	rhoptries 1	yes	NA
Bdiv_025340c	PF3D7_0817600	TGME49_253600	All3	hypothetical protein		No	NA	NA	apical 1	NA	NA
Bdiv_027540	PF3D7_1114400	TGME49_213420	All3	hypothetical protein		Yes	NA	NA	NA	NA	NA
Bdiv_028200c	PF3D7_0723100	TGME49_266630	All3	hypothetical protein		No	NA	NA	apical 1	NA	NA
Bdiv_028210	PF3D7_0723200	TGME49_218510	All3	membrane protein, putative,hypothetical protein		Yes	NA	NA	NA	NA	NA
Bdiv_028910c	PF3D7_1234100	TGME49_276180	All3	bromodomain containing protein		No	NA	NA	apical 2	NA	NA
Bdiv_029390	PF3D7_0216600	TGME49_300250	All3	Mtn3/RAG1IP-like protein, putative		Yes	Yes		NA	NA	NA
Bdiv_029920	PF3D7_0209600	TGME49_208420	All3	hypothetcial protein		No	NA	NA	apical 1	NA	NA
Bdiv_030040c	PF3D7_0928400	TGME49_304890	All3	hypothetical protein, conserved		Yes	NA	NA	NA	NA	NA
Bdiv_030730	PF3D7_0825600	TGME49_286070	All3	hypothetical protein, conserved		No	NA	NA	apical 2	NA	NA
Bdiv_030950c	PF3D7_1440400	TGME49_242320	All3	B-box zinc finger domain-containing protein		No	NA	NA	apical 2	NA	NA
Bdiv_032650	PF3D7_1407000	TGME49_263410	All3	LCCL domain containing protein		Yes	Yes		NA	NA	NA
Bdiv_032880	PF3D7_1251200	TGME49_216970	All3	WD domain, G-beta repeat containing protein	coronin	No	NA	NA	NA	NA	Yes
Bdiv_033110	PF3D7_1031700	TGME49_226825	All3	protein phosphatase inhibitor family protein		Yes	NA	NA	NA	NA	NA
Bdiv_033220	PF3D7_1454400	TGME49_261600	All3	metallopeptidase M24 family protein		No	Yes		NA	NA	NA
Bdiv_033250c	PF3D7_0905100	TGME49_259640	All3	hypothetical protein		No	NA	NA	dense granules	NA	NA
Bdiv_033720	PF3D7_0917900	TGME49_311720	All3	heat shock protein 70 precursor, putative		Yes	NA	yes	NA	NA	NA
Bdiv_033760	PF3D7_1105800	TGME49_215430	All3	conserved hypothetical protein		No	Yes		NA	NA	NA
Bdiv_034340c	PF3D7_0109100	TGME49_256040	All3	conserved hypothetical protein		Yes	Yes		NA	NA	NA
Bdiv_034910c	PF3D7_1332200	TGME49_306350	All3	hypothetical protein		No	NA	NA	apical 1	NA	NA
Bdiv_035060	PF3D7_1475500	TGME49_223700	All3	LCCL domain containing protein		Yes	Yes		NA	NA	NA
Bdiv_035350c	PF3D7_1104400	TGME49_209950	All3	conserved hypothetical protein		Yes	Yes		NA	NA	NA
Bdiv_036070c	PF3D7_1140000	TGME49_297070	All3	membrane protein, putative	yes (carbonic acid)	Yes	NA	NA	rhoptries 2	yes	NA
Bdiv_038530	PF3D7_0904200	TGME49_273040	All3	conserved hypothetical protein		Yes	Yes		NA	NA	NA
Bdiv_038560c	PF3D7_0904700	TGME49_227970	All3	conserved hypothetical protein		No	Yes		NA	NA	NA
Bdiv_038660	PF3D7_1441600	TGME49_312660	All3	conserved hypothetical protein		No	NA	NA	apical 2	NA	NA
Bdiv_039160	PF3D7_0216800	TGME49_319500	All3	membrane protein, putative	TMEM121 protein	Yes	NA	NA	NA	yes	NA
Bdiv_039530	PF3D7_1446600	TGME49_250340	All3	centrin, putative		No	NA	NA	apical 2	NA	NA
Bdiv_040020	PF3D7_1330600	TGME49_262380	All3	translation elongation factor Tu		Yes	NA	NA	apical 2	NA	NA
Bdiv_000190	NA	NA	Bd	hypothetical protein, conserved	paralog of (Bdiv_002280c). B. divergens specific	No	NA	NA	NA	NA	Yes
Bdiv_000320c	NA	NA	Bd	hypothetical protein	Found in all/most piroplasms	Yes	NA	NA	NA	NA	Yes
Bdiv_001540	NA	NA	Bd	membrane protein, putative	Found in all/most Babesia spp.	Yes	NA	NA	NA	yes	NA
Bdiv_002280c	NA	NA	Bd	hypothetical protein, conserved	paralog of (Bdiv_000190). B. divergens specific	No	NA	NA	NA	NA	Yes
Bdiv_003310c	NA	NA	Bd	hypothetical protein	Found in few Babesia spp.	Yes	NA	NA	NA	yes	NA
Bdiv_003930c	NA	NA	Bd	hypothetical protein	Found in all/most piroplasms	No	NA	NA	NA	NA	Yes
Bdiv_005810	NA	NA	Bd	hypothetical protein	Found in all/most piroplasms	No	NA	NA	NA	NA	Yes
Bdiv_005990	NA	NA	Bd	hypothetical protein	Found in all/most piroplasms	Yes	NA	NA	NA	yes	NA
Bdiv_007930c	NA	NA	Bd	hypothetical protein	Found in all/most Babesia spp.	No	NA	NA	NA	NA	Yes
Bdiv_009990c	NA	NA	Bd	hypothetical protein	Found in all/most Babesia spp.	Yes	NA	NA	NA	yes	NA
Bdiv_011150	NA	NA	Bd	mac/perforin domain containing protein	PLP3	Yes	NA	NA	NA	yes	NA
Bdiv_011730c	NA	NA	Bd	membrane protein, putative	Found in all/most Babesia spp.	Yes	NA	NA	NA	yes	NA
Bdiv_012620	NA	NA	Bd	hypothetical protein, conserved	Divergent from other Babesia spp	No	NA	NA	NA	NA	Yes
Bdiv_013630c	NA	NA	Bd	hypothetical protein	Has paralogue Bdiv_002010 . Found in all/most piroplasms.	Yes	NA	NA	NA	NA	Yes
Bdiv_015350c	NA	NA	Bd	hypothetical protein	Found in few Babesia spp.	Yes	NA	NA	NA	yes	NA
Bdiv_017840c	NA	NA	Bd	hypothetical protein	Found in few piroplasms	Yes	NA	NA	NA	yes	NA
Bdiv_018780	NA	NA	Bd	membrane protein, putative	Eukaryotic all	Yes	NA	NA	NA	NA	Yes
Bdiv_021610	NA	NA	Bd	membrane protein, putative	Found in few Babesia spp.	Yes	NA	NA	NA	NA	Yes
Bdiv_021720	NA	NA	Bd	membrane protein, putative	Found in few Babesia spp.	Yes	NA	NA	NA	yes	NA
Bdiv_021770	NA	NA	Bd	hypothetical protein, conserved	divergens unique	No	NA	NA	NA	NA	Yes
Bdiv_021910	NA	NA	Bd	membrane protein, putative	Found in all/most piroplasms. Membrane protein	Yes	NA	NA	NA	NA	Yes
Bdiv_022630	NA	NA	Bd	rhoptry-associated protein 1 (RAP-1)	RAP1 (ortholog of Bdiv_025600). Found in all/most Babesia spp.	Yes	NA	NA	NA	yes	NA
Bdiv_023070c	NA	NA	Bd	RAP-1 related antigen (RRA)	rra	Yes	NA	NA	NA	yes	NA
Bdiv_023140c	NA	NA	Bd	aspartyl protease, putative	BdAsp2. Found in all/most piroplasms.	Yes	NA	NA	NA	yes	NA
Bdiv_023800	NA	NA	Bd	hypothetical protein, conserved	Found in few Babesia spp.	Yes	NA	NA	NA	yes	NA
Bdiv_023860c	NA	NA	Bd	hypothetical protein		Yes	NA	NA	NA	yes	NA
Bdiv_024320	NA	NA	Bd	hypothetical protein	Found in few Babesia spp.	Yes	NA	NA	NA	yes	NA
Bdiv_024770c	NA	NA	Bd	hypothetical protein	Found in few Babesia spp.	Yes	NA	NA	NA	yes	NA
Bdiv_025600	NA	NA	Bd	rhoptry-associated protein 1 (RAP-1)	RAP1 (ortholog of Bdiv_022630). Found in all/most Babesia spp.	Yes	NA	NA	NA	yes	NA
Bdiv_029120c	NA	NA	Bd	membrane protein, putative	Found in few Babesia spp.	Yes	NA	NA	NA	yes	NA
Bdiv_032750	NA	NA	Bd	hypothetical protein	Found in all/most piroplasms	No	NA	NA	NA	NA	Yes
Bdiv_034320c	NA	NA	Bd	hypothetical protein, conserved	Divergent from other Babesia spp	Yes	NA	NA	NA	NA	Yes
Bdiv_035910c	NA	NA	Bd	hypothetical protein	Found in few piroplasms	Yes	NA	NA	NA	yes	NA
Bdiv_037310c	NA	NA	Bd	hypothetical protein	Found in few Babesia spp.	No	NA	NA	NA	NA	Yes
Bdiv_037450c	NA	NA	Bd	membrane protein, putative	RASP1 (PfMAg-1)	Yes	NA	NA	NA	NA	Yes
Bdiv_039920	NA	NA	Bd	hypothetical protein	Found in all/most piroplasms	Yes	NA	NA	NA	yes	NA
Bdiv_040540	NA	NA	Bd	hypothetical protein	Found in all/most piroplasms	No	NA	NA	NA	NA	Yes
Bdiv_012700	PF3D7_0408600	NA	Bd-Pf	conserved membrane protein	(Pf sporozoite invasion-associated protein 1)	Yes	NA	yes	NA	NA	NA
Bdiv_015150c	PF3D7_0104700	NA	Bd-Pf	conserved hypothetical protein		Yes	NA	NA	NA	NA	NA
Bdiv_021060	PF3D7_1222300	NA	Bd-Pf	heat shock protein 90, putative		Yes	NA	yes	NA	NA	NA
Bdiv_023260c	PF3D7_1431400	NA	Bd-Pf	membrane protein, putative	SRA	Yes	NA	NA	NA	yes	NA
Bdiv_023500	PF3D7_0709200	NA	Bd-Pf	hypothetical protein		Yes	NA	NA	NA	NA	NA
Bdiv_026900	PF3D7_1208200	NA	Bd-Pf	GCC2 and GCC3 domain containing protein		Yes	NA	NA	NA	NA	NA
Bdiv_027180	PF3D7_1323600	NA	Bd-Pf	hypothetical protein		Yes	Yes		NA	NA	NA
Bdiv_027450	PF3D7_0210600	NA	Bd-Pf	conserved hypothetical protein	RASP1/PfMAg-1	No	NA	NA	NA	NA	Yes
Bdiv_028030	PF3D7_1216600	NA	Bd-Pf	membrane protein, putative	CelTOS. conserved in bab and theil. Possible cell traversal protein	Yes	Yes		NA	NA	Yes
Bdiv_034730c	PF3D7_1014200	NA	Bd-Pf	membrane protein, putative		Yes	NA	NA	NA	NA	NA
Bdiv_036350	PF3D7_0812900	NA	Bd-Pf	membrane protein, putative		Yes	NA	NA	NA	NA	NA
Bdiv_039870c	PF3D7_1322000	NA	Bd-Pf	hypothetical protein, conserved		No	Yes		NA	NA	NA
Bdiv_001370c	NA	TGME49_222350	Bd-Tg	hypothetical protein		No	NA	NA	apical 1	NA	NA
Bdiv_007590c	NA	TGME49_304720	Bd-Tg	conserved hypothetical protein		No	NA	NA	dense granules	NA	NA
Bdiv_013600	NA	TGME49_272350	Bd-Tg	mRNA export protein, putative		No	NA	NA	dense granules	NA	NA
Bdiv_020650	NA	TGME49_277910	Bd-Tg	hypothetical protein		No	NA	NA	micronemes	NA	NA
Bdiv_024680	NA	TGME49_243250	Bd-Tg	myosin B	MyoB	No	NA	NA	apical 2	NA	NA
Bdiv_026510c	NA	TGME49_216820	Bd-Tg	transporter, putative		No	NA	NA	micronemes	NA	NA
Bdiv_026920	NA	TGME49_292020	Bd-Tg	GCC2 and GCC3 domain containing protein		No	NA	NA	micronemes	NA	NA
Bdiv_031730c	NA	TGME49_205330	Bd-Tg	membrane protein, putative		Yes	NA	NA	NA	NA	NA
Bdiv_036290	NA	TGME49_320580	Bd-Tg	hypothetical protein		Yes	NA	NA	NA	yes	NA
Bdiv_036750c	NA	TGME49_315160	Bd-Tg	conserved hypothetical protein	RASP2	No	NA	NA	rhoptries 2	NA	Yes
Bdiv_038750c	NA	TGME49_205680	Bd-Tg	hypothetical protein		No	NA	NA	micronemes	NA	NA
